# Supplementary material
Source: publisher site journal article supplement (https://www.dovepress.com/get_supplementary_file.php?f=450917.docx)
Supplement: Supplementary file 1 [file get_supplementary_file.php]

**Supporting Information**

**Synthesis and anti-diabetic activity of an 8-purine derivative as novel DPP-4 inhibitor in obese diabetic Zücker Rats**

Meriem Chayah1,2,3, María Angélica Luque-González1, Verónica Gómez-Pérez V1, Diego Salagre4,5, Amjad Al-Shdaifat6, Joaquín María Campos1,2, Ana Conejo-García1,2*, Ahmad Agil2,4,5*

1Department of Medicinal and Organic Chemistry and Excellence Research Unit of Chemistry Applied to Biomedicine and the Environment, Faculty of Pharmacy, University of Granada, Granada, Spain; 2Biosanitary Institute of Granada (ibs.GRANADA), SAS-University of Granada, Granada, Spain; 3Centre for Genomics and Oncological Research, Pfizer/University of Granada/Andalusian Regional Government (GENYO), Granada, Spain; 4Department of Pharmacology, Faculty of Medicine, University of Granada, Granada, Spain; 5Federico Oloriz Neuroscience Institute, University of Granada, Granada, Spain; 6Department of Medicine and Family Medicine, Faculty of Medicine, Hashemite University, Zarqa, Jordania

* Corresponding author

**Table of contents**

**Figure S1.** 1H NMR spectra 2

**Figure S2.** 13C NMR spectra 2

**Figure S3.** DEPT spectra 3

**Figure S1.**1H NMR of compound **1**

**Figure S2.**13C NMR of compound **1**

**Figure S3.**DEPT of compound **1**
